# Supplementary material for: Exploring Drivers of Work-Related Stress in General Practice Teams as an Example for Small and Medium-Sized Enterprises: Protocol for an Integrated Ethnographic Approach of Social Research Methods
Source: PubMed Central journal article supplement (PMC7055789; doi:10.2196/15809), 2020-02-11
Supplement: resprot_v9i2e15809_app2.pdf [file resprot_v9i2e15809_app2.pdf]

## **IMPROVEjob-Consortium**

### **Current Institutions and Members:**

*Institute of Occupational and Social Medicine and Health Services Research, University Hospital Tuebingen, Germany: MA Rieger, E Rind, A Siegel, A Wagner, E Tsarouha*

*Department of Psychosomatic Medicine and Psychotherapy, Medical Clinic, University Hospital Tuebingen, Germany: F Junne, T Seifried-Dübon, F Stuber, A Herrmann-Werner, S Zipfel*

*Institute of General Practice and Family Medicine, University Hospital Bonn, Germany: B Weltermann, S Kasten, K Linden, L Degen*

*Operations Research, Ruhr-University Bochum, Germany: B Werners, M Grot*

*Institute for Medical Informatics, Biometry and Epidemiology & Center for Clinical Studies, University of Duisburg-Essen, Germany: K-H Jöckel, C Pieper, V Schröder, J-M Bois, A-L Eilerts, M Brinkmann*

### **Former Institutions and Members:**

*Institute for General Medicine, University Hospital Essen, Germany: C Kersting*

*Institute of Occupational and Social Medicine and Health Services Research, University Hospital Tuebingen, Germany: S Emerich, S Burgess, M Hippler*

*Institute of General Practice and Family Medicine, University Hospital Bonn, Germany: A Dreher*

*Institute for Medical Informatics, Biometry and Epidemiology & Centre for Clinical Trials, University of Duisburg-Essen, Germany: C Ose*

*Operations Research, Ruhr-University Bochum, Germany: L Koppka (Imhoff), J Block*
