# Supplementary material for: Exploring Drivers of Work-Related Stress in General Practice Teams as an Example for Small and Medium-Sized Enterprises: Protocol for an Integrated Ethnographic Approach of Social Research Methods
Source: PubMed Central journal article supplement (PMC7055789; doi:10.2196/15809), 2020-02-11
Supplement: resprot_v9i2e15809_app3.pdf [file resprot_v9i2e15809_app3.pdf]

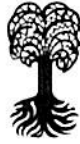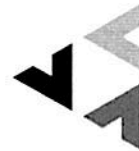

## Ethik-Kommission an der Medizinischen Fakultät der Eberhard-Karls-Universität und am Universitätsklinikum Tübingen

Gartenstr. 47, D-72074 Tübingen, Tel. +49/7071/2977661, +49/7071/295965

### INDEPENDENT ETHICS COMMITTEE (IEC) APPROVAL FORM

#### DETAILS OF INVESTIGATOR/TRIAL

IEC-Project Number: **640/2017BO2**

Date of submission: 04.10.2017, 26.06.2018

Investigator (Name, Address):

**Sigrid Emerich, B.A.**  
**Institut für Arbeitsmedizin, Sozialmedizin und**  
**Versorgungsforschung**  
**Wilhelmstr. 27**  
**72074 Tübingen**

Protocol title: **IMPROVEjob - Participatory intervention to improve the psychological well-being in primary care practice teams: a model for structural and behavioural prevention in small and medium-sized enterprises.**

The following documents were reviewed (zuletzt eingereicht): Studienprotokoll Version 3.1 vom 21.06.2018, Persönliches Anschreiben für Praxisinhaber/in, Informationsschreiben und Einverständniserklärung für Praxisinhaber/in, Information und Einverständniserklärung für Einzelinterviews, Information und Einverständniserklärung für Fokusgruppeninterviews, Informationsschild für Patienten/Patientinnen, Schweigepflichterklärung Beobachterinnen, Einverständniserklärung zur Durchführung einer teilnehmenden Beobachtung und Datenerhebung, Rekrutierungsschreiben, Persönliches Anschreiben für Praxisinhaber/in, Praxisaushang

Is the investigator a member of the IEC?  no  yes

#### IEC DECISION

- The study was approved
- Conditional approval was granted for the study. /Modifications are required prior to approval.
- The study was disapproved: documents may be resubmitted after changes have been made.

The IEC of the University of Tübingen is organized and operates according to ICH-GCP and applicable laws and regulations.

#### SIGNATURE:

I confirm that the details on this form are correct:

Prof. Dr.med. Karl Jaschonek  
Chairman, IEC

2019-05-31

Signature of Chairman, IEC

Name

Date

Attachments: Approval letter, List of Committee members and their occupations

Universitätsklinikum Tübingen  
Anstalt des öffentlichen Rechts  
Sitz Tübingen  
Geissweg 3 • 72076 Tübingen  
Tel 07071/29-0  
www.medicin.uni-tuebingen.de  
Steuer-Nr 86156/09402  
USt-ID: DE 146 889 674

Aufsichtsrat  
Ulrich Steinbach (Vorsitzender)  
Vorstand  
Prof. Dr. Michael Bamberg (Vorsitzender)  
Gabriele Sonntag (Stellv. Vorsitzende)  
Prof. Dr. Karl Ulrich Bartz-Schmidt  
Prof. Dr. Ingo B. Autenneth  
Klaus Tischler

Baden-Württembergische Bank Stuttgart  
BLZ 600 501 01 Konto-Nr. 7477 5037 93  
IBAN: DE 41 6005 0101 7477 5037 93  
BIC (SWIFT-Code): SOLADEST600  
Kreissparkasse Tübingen  
BLZ 641 500 20 Konto-Nr. 14 144  
IBAN: DE 79 6415 0020 0000 0141 44  
BIC (SWIFT-Code): SOLADES1TUB
