# Supplementary material for: Exploring Drivers of Work-Related Stress in General Practice Teams as an Example for Small and Medium-Sized Enterprises: Protocol for an Integrated Ethnographic Approach of Social Research Methods
Source: PubMed Central journal article supplement (PMC7055789; doi:10.2196/15809), 2020-02-11
Supplement: resprot_v9i2e15809_app5.pdf [file resprot_v9i2e15809_app5.pdf]

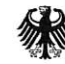

DLR Project Management Agency  
Heinrich-Konen-Straße 1, 53227 Bonn, Germany

DLR Project Management Agency Department Health

Your reference

Your letter of

Our reference

M. Ebert

Your correspondent

Dr. Ebert

Telephone +49 228 3821-

1739

Telefax +49 228 3821-

1257

E-mail

Michael.ebert@dlr.de

### To whom it may concern

26.06.2019

Dear Sir or Madam,

This is to confirm that the research consortium **IMPROVEjob-Consortium** ("Participatory intervention to improve the psychological well-being in primary care practice teams: a model for structural and behavioural prevention in small and medium –sized enterprises (SMEs)") with the following research projects (RP) is funded by the German Federal Ministry of Education and Research:

- **Coordination of the Consortium, Central Project & subproject RP 1:** 01GL1751A ("Working conditions, occupational health and safety, management and communication in family practices and transfer options in SMEs", **including the study protocol:** "Exploring drivers of work-related psychological stress in general practice teams as an example for small and medium-sized enterprises – a study protocol for an integrated qualitative approach of social research methods" (PI: Prof. Monika Rieger, University of Tübingen; amount of funding: 983.492€)
- **RP 2:** 01GL1751B ("Evaluation of the Intervention") (PI: Prof. Birgitta Weltermann, University of Bonn; amount of funding: 315.540€)
- **RP 3:** 01GL1751C ("Workflows and stochastic modelling") (PI: Prof. Brigitte Werners; University of Bochum; amount of funding: 67.912€)
- **RP 4:** 01GL1851D ("Development of the Intervention and feasibility study") (PI: Prof. Birgitta Weltermann; University of Bonn; amount of funding: 571.510€)

During application for funding, the scientists' concepts were peer reviewed by the funding body. Please do not hesitate to contact us in case of further questions.

Sincerely

i.A.



Dr. Michael Ebert

i.A.



Diana Klassen
